# Supplementary material for: Challenges Predicting Ligand-Receptor Interactions of Promiscuous Proteins: The Nuclear Receptor PXR
Source: PubMed Central journal article supplement (PMC2781111; doi:10.1371/journal.pcbi.1000594), 2009-12-11
Supplement: pcbi.1000594.s002.pdf [file pcbi.1000594.s002.pdf]

## **Challenges Predicting Ligand-Receptor Interactions of Promiscuous Proteins:**

### **The Nuclear Receptor PXR**

Sean Ekins<sup>1,2,3\*</sup>, Sandhya Kortagere<sup>4</sup>, Manisha Iyer<sup>5</sup>, Erica J. Reschly<sup>5</sup>, Markus A. Lill<sup>6</sup>, Matthew R. Redinbo<sup>7,8,9</sup> and Matthew D. Krasowski<sup>5,10</sup>.

<sup>1</sup>Collaborations in Chemistry, 601 Runnymede Avenue, Jenkintown, PA 19046, USA

<sup>2</sup>Department of Pharmaceutical Sciences, University of Maryland, 20 Penn Street, Baltimore, MD 21201, USA

<sup>3</sup>Department of Pharmacology, University of Medicine & Dentistry of New Jersey (UMDNJ)- Robert Wood Johnson Medical School, 675 Hoes lane, Piscataway, NJ 08854, USA

<sup>4</sup>Department of Microbiology and Immunology, Drexel University College of Medicine, Philadelphia, PA 19129, USA.

<sup>5</sup>Department of Pathology, University of Pittsburgh, Pittsburgh, PA, 15261, USA

<sup>6</sup>Department of Medicinal Chemistry and Molecular Pharmacology, Purdue University, West Lafayette, IN 47907, USA.

<sup>7</sup>Department of Chemistry, University of North Carolina at Chapel Hill, Chapel Hill, NC, 27599, USA,

<sup>8</sup>Department of Biochemistry and Biophysics, University of North Carolina at Chapel Hill, Chapel Hill, NC 27599, USA,

<sup>9</sup>The Lineberger Comprehensive Cancer Center, University of North Carolina at Chapel Hill, Chapel Hill, NC 27514, USA,

<sup>10</sup> Current address: Department of Pathology, University of Iowa Hospitals and Clinics, Iowa City, IA 52242, USA

**Corresponding author:** Sean Ekins, Ph.D., D.Sc., Collaborations in Chemistry, 601 Runnymede Avenue, Jenkintown, PA 19046. Phone 215-687-1320; Fax 215-481-0159;

\* Email [ekinssean@yahoo.com](mailto:ekinssean@yahoo.com)

**Table S2.** Dataset of human PXR activation used for modeling studies and classification based on docking experiments.

| Compound Name               | Human PXR EC <sub>50</sub> (μM) | Human PXR Activity (-log EC <sub>50</sub> ) | Human PXR Efficacy (ε) | Test set for ComFA | Docking Classification |
|-----------------------------|---------------------------------|---------------------------------------------|------------------------|--------------------|------------------------|
| ANDROSTANES                 |                                 |                                             |                        |                    |                        |
| 17β-dihydroandrosterone     | 4.15                            | 5.38                                        | 0.68                   |                    | A                      |
| Androstanedione             | 12.7                            | 4.90                                        | 0.87                   |                    | N                      |
| Androstanol                 | 6.27                            | 5.20                                        | 0.5                    |                    | A                      |
| Androsterone                | 18.6                            | 4.73                                        | 0.93                   |                    | A                      |
| Dihydrotestosterone         | 11.4                            | 4.94                                        | 0.39                   |                    | A                      |
| Etiocolanolone              | 5.7                             | 5.24                                        | 0.54                   |                    | A                      |
| Androstenedione             | 20.6                            | 4.69                                        | 0.59                   | X                  | N                      |
| Testosterone                | 71.9                            | 4.14                                        | 0.22                   |                    | A                      |
| DHEA                        | 32.5                            | 4.49                                        | 0.52                   |                    | A                      |
| Androstenol                 | 5.5                             | 5.26                                        | 0.7                    |                    | A                      |
| 11β-Hydroxyetiocholanolone  | 19.2                            | 4.72                                        | 0.51                   |                    | A                      |
| DHEA sulfate (sodium salt)  | 48.2                            | 4.32                                        | 0.22                   |                    | N                      |
| Epiandrosterone             | 4.91                            | 5.31                                        | 0.7                    |                    | A                      |
| 11-Ketoetiocholanone        | 41.1                            | 4.39                                        | 0.15                   | X                  | A                      |
| Epitestosterone             | 68                              | 4.17                                        | 0.9                    |                    | A                      |
| Epitestosterone glucuronide | 13.8                            | 4.86                                        | 0.69                   |                    | N                      |
| Epitestosterone sulfate     | 3.39                            | 5.47                                        | 0.67                   | X                  | N                      |
| Etiocolanolone glucuronide  | 10000                           | 2.00                                        | 0                      |                    | N                      |
| 5α-Androstane               | 10000                           | 2.00                                        | 0                      | X                  | N                      |
| 5α-Androstan-3β-ol          | 0.8                             | 6.10                                        | 0.43                   |                    | A                      |
| 16,(5α)-Androsten-3β-ol     | 4.77                            | 5.32                                        | 1.01                   |                    | A                      |
| 16,(5α)-Androsten-3-one     | 3                               | 5.52                                        | 0.96                   |                    | A                      |
| 5β-Androstan-3α-ol          | 1.41                            | 5.85                                        | 1.12                   |                    | A                      |
| 4,16-Androstadien-3-one     | 7.1                             | 5.15                                        | 0.64                   | X                  | N                      |
| 5,16-Androstadien-3β-ol     | 10000                           | 2.00                                        | 0                      |                    | A                      |
| PREGNANES                   |                                 |                                             |                        |                    |                        |
| Pregnanediol                | 5.1                             | 5.29                                        | 0.34                   |                    | A                      |
| Pregnanedione               | 2.6                             | 5.59                                        | 0.97                   |                    | A                      |
| Corticosterone              | 9.95                            | 5.00                                        | 0.54                   | X                  | N                      |
| Cortexolone                 | 23                              | 4.64                                        | 0.49                   |                    | N                      |
| Aldosterone                 | 55                              | 4.26                                        | 0.21                   |                    | N                      |
| Cortisone                   | 69.4                            | 4.16                                        | 0.28                   | X                  | N                      |
| Progesterone                | 14.7                            | 4.83                                        | 0.57                   |                    | N                      |

|                                                               |       |      |      |   |   |
|---------------------------------------------------------------|-------|------|------|---|---|
| 17-Hydroxyprogesterone                                        | 17.7  | 4.75 | 0.7  |   | A |
| Cortexone                                                     | 2.44  | 5.61 | 0.3  |   | N |
| Cortisol                                                      | 47.6  | 4.32 | 0.66 |   | N |
| 17-Hydroxypregnenolone                                        | 33.5  | 4.47 | 0.36 |   | A |
| Pregnenolone                                                  | 2.3   | 5.64 | 1.26 | X | A |
| Pregnenolone carbonitrile (PCN)                               | 10000 | 2.00 | 0    |   | N |
| Allopregnanolone                                              | 4.21  | 5.38 | 0.46 |   | A |
| Allopregnanediol                                              | 52.5  | 4.28 | 0.16 |   | A |
| Pregnanediol glucuronide                                      | 55.1  | 4.26 | 0.17 | X | N |
| Cortol                                                        | 47.2  | 4.33 | 0.83 |   | N |
| Cortolone                                                     | 44.7  | 4.35 | 0.72 |   | N |
| Tetrahydrocortisone                                           | 52.7  | 4.28 | 0.8  |   | N |
| THDOC                                                         | 12.5  | 4.90 | 0.26 |   | N |
| 17 $\alpha$ ,20 $\beta$ -Dihydroxyprogesterone                | 10000 | 2.00 | 0    | X | N |
| 17 $\alpha$ ,20 $\beta$ -Dihydroxyprogesterone sodium sulfate | 1.88  | 5.73 | 0.66 |   | N |
| 5 $\beta$ -Pregnan-3 $\alpha$ ,20 $\beta$ ,diol               | 3.81  | 5.42 | 0.49 |   | A |
| Tetrahydrocortisol                                            | 46.5  | 4.33 | 0.73 |   | N |
| Pregnanolone                                                  | 10.4  | 4.98 | 0.55 |   | A |
| Pregnenolone sulfate                                          | 10000 | 2.00 | 0    |   | N |
| Levonorgestrol                                                | 4.30  | 5.37 | 0.35 |   | N |
| Norethindrone                                                 | 25.60 | 4.59 | 0.32 |   | A |
| Dexamethasone                                                 | 41.00 | 4.39 | 0.83 | X | N |
| ESTRATRIENES                                                  |       |      |      |   |   |
| Estradiol                                                     | 16    | 4.80 | 0.34 |   | A |
| Estrone                                                       | 37.9  | 4.42 | 0.47 |   | N |
| Estriol                                                       | 10000 | 2.00 | 0    |   | N |
| 16 $\alpha$ -Hydroxyestrone                                   | 2.5   | 5.60 | 0.42 |   | N |
| 4-Methoxyestrone                                              | 4     | 5.40 | 0.93 |   | N |
| Estetrol                                                      | 2.14  | 5.67 | 0.29 |   | N |
| 2-Hydroxyestrone                                              | 3.6   | 5.44 | 0.93 |   | N |
| Estrone 3-sulfate                                             | 3.4   | 5.47 | 0.43 |   | N |
| Estradiol glucuronide                                         | 10000 | 2.00 | 0    |   | N |
| Estradiol 3-sulfate                                           | 0.89  | 6.05 | 0.6  |   | N |
| Ethinyl estradiol                                             | 1.9   | 5.72 | 0.68 |   | A |
| BILE ACIDS /SALTS                                             |       |      |      |   |   |
| 5 $\beta$ -Petromyzonol                                       | 10000 | 2.00 | 0    |   | A |
| Hyodeoxycholic acid                                           | 38.1  | 4.42 | 0.17 |   | A |
| Taurohyodeoxycholic acid                                      | 19    | 4.72 | 0.39 |   | N |
| Murocholic acid (Murideoxycholic acid)                        | 10000 | 2.00 | 0    |   | A |
| Chenodeoxycholic acid                                         | 10000 | 2.00 | 0    | X | A |
| Glycochenodeoxycholic acid                                    | 10000 | 2.00 | 0    |   | N |

|                                                                       |       |      |      |   |   |
|-----------------------------------------------------------------------|-------|------|------|---|---|
| Taurochenodeoxycholic acid                                            | 104   | 3.98 | 0.5  |   | N |
| Deoxycholic acid                                                      | 50.2  | 4.30 | 0.19 |   | A |
| Glycodeoxycholic acid                                                 | 10000 | 2.00 | 0    | X | N |
| Taurodeoxycholic acid                                                 | 10000 | 2.00 | 0    |   | N |
| Lithocholic acid                                                      | 10    | 5.00 | 0.15 |   | A |
| Glycolithocholic acid                                                 | 16.1  | 4.79 | 0.49 |   | A |
| Taurolithocholic acid                                                 | 19.8  | 4.70 | 0.15 |   | N |
| 7,12-Diketolithocholic acid                                           | 35.5  | 4.45 | 0.31 |   | A |
| 7-Ketolithocholic acid                                                | 21.5  | 4.67 | 0.58 |   | A |
| 12-Ketolithocholic acid                                               | 31.3  | 4.50 | 0.86 |   | A |
| $\omega$ -Muricholic acid                                             | 10000 | 2.00 | 0    |   | A |
| $\alpha$ -Muricholic acid                                             | 56    | 4.25 | 0.79 |   | A |
| $\beta$ -Muricholic acid                                              | 10000 | 2.00 | 0    |   | A |
| Cholic acid                                                           | 11.6  | 4.94 | 0.56 |   | A |
| Glycocholic acid                                                      | 10000 | 2.00 | 0    |   | N |
| Taurocholic acid                                                      | 10000 | 2.00 | 0    | X | N |
| 5 $\beta$ -cholestan-3 $\alpha$ ,7 $\alpha$ ,12 $\alpha$ -triol       | 10000 | 2.00 | 0    | X | A |
| 20 $\alpha$ -hydroxycholesterol                                       | 10000 | 2.00 | 0    |   | A |
| Cholesterol                                                           | 10000 | 2.00 | 0    |   | A |
| 23-Nordeoxycholic acid                                                | 16.4  | 4.79 | 0.5  | X | A |
| 23-Norcholic acid                                                     | 96    | 4.02 | 0.49 |   | A |
| 3-Ketopetromyzonol                                                    | 10000 | 2.00 | 0    |   | A |
| Petromyzonol                                                          | 10000 | 2.00 | 0    |   | A |
| Petromyzonol sulfate                                                  | 28.1  | 4.55 | 1.02 | X | N |
| Allocholic acid                                                       | 10000 | 2.00 | 0    |   | A |
| 3-Ketopetromyzonol sulfate                                            | 10000 | 2.00 | 0    |   | N |
| 3-Keto-7 $\alpha$ ,12 $\alpha$ -dihydroxy-5 $\alpha$ -cholanolic acid | 12.1  | 4.92 | 0.26 |   | A |
| Scymnol - sulfated                                                    | 49.3  | 4.31 | 0.39 | X | N |
| Scymnol - desulfated                                                  | 10000 | 2.00 | 0    |   | A |
| 5 $\alpha$ -cyprinol - sulfated                                       | 25.9  | 4.59 | 1.1  |   | N |
| 5 $\alpha$ -cyprinol - desulfated                                     | 10000 | 2.00 | 0    |   | A |
| Alligator bile acid                                                   | 10000 | 2.00 | 0    |   | A |
| Myxinol - sulfated                                                    | 10000 | 2.00 | 0    |   | A |
| Myxinol - desulfated                                                  | 10000 | 2.00 | 0    |   | A |
| Lithocholic acid 3-sulfate                                            | 117.9 | 3.93 | 0.69 |   | N |
| 7-Ketodeoxycholic acid                                                | 58.2  | 4.24 | 0.49 |   | A |
| Glycolithocholic acid 3-sulfate, disodium salt                        | 56.2  | 4.25 | 0.19 |   | N |
| Taurolithocholic acid 3-sulfate, disodium salt                        | 83.2  | 4.08 | 0.55 | X | N |
| $\alpha$ -Cholestanol                                                 | 10000 | 2.00 | 0    | X | A |
| Tauro- $\beta$ -muricholic acid                                       | 10000 | 2.00 | 0    |   | N |
| 7 $\alpha$ -Hydroxycholesterol                                        | 10000 | 2.00 | 0    |   | A |
| 3-Ketolithocholic acid                                                | 8.3   | 5.08 | 0.42 |   | A |

|                                       |     |      |      |  |   |
|---------------------------------------|-----|------|------|--|---|
| Lithocholic acid acetate              | 1.2 | 5.92 | 0.54 |  | A |
| Lithocholic acid acetate methyl ester | 1.1 | 5.96 | 0.49 |  | A |
