# Supplementary material for: Challenges Predicting Ligand-Receptor Interactions of Promiscuous Proteins: The Nuclear Receptor PXR
Source: PubMed Central journal article supplement (PMC2781111; doi:10.1371/journal.pcbi.1000594), 2009-12-11
Supplement: pcbi.1000594.s003.pdf [file pcbi.1000594.s003.pdf]

## **Challenges Predicting Ligand-Receptor Interactions of Promiscuous Proteins:**

### **The Nuclear Receptor PXR**

Sean Ekins<sup>1,2,3\*</sup>, Sandhya Kortagere<sup>4</sup>, Manisha Iyer<sup>5</sup>, Erica J. Reschly<sup>5</sup>, Markus A. Lill<sup>6</sup>, Matthew R. Redinbo<sup>7,8,9</sup> and Matthew D. Krasowski<sup>5,10</sup>.

<sup>1</sup>Collaborations in Chemistry, 601 Runnymede Avenue, Jenkintown, PA 19046, USA

<sup>2</sup>Department of Pharmaceutical Sciences, University of Maryland, 20 Penn Street, Baltimore, MD 21201, USA

<sup>3</sup>Department of Pharmacology, University of Medicine & Dentistry of New Jersey (UMDNJ)- Robert Wood Johnson Medical School, 675 Hoes lane, Piscataway, NJ 08854, USA

<sup>4</sup>Department of Microbiology and Immunology, Drexel University College of Medicine, Philadelphia, PA 19129, USA.

<sup>5</sup>Department of Pathology, University of Pittsburgh, Pittsburgh, PA, 15261, USA

<sup>6</sup>Department of Medicinal Chemistry and Molecular Pharmacology, Purdue University, West Lafayette, IN 47907, USA.

<sup>7</sup>Department of Chemistry, University of North Carolina at Chapel Hill, Chapel Hill, NC, 27599, USA,

<sup>8</sup>Department of Biochemistry and Biophysics, University of North Carolina at Chapel Hill, Chapel Hill, NC 27599, USA,

<sup>9</sup>The Lineberger Comprehensive Cancer Center, University of North Carolina at Chapel Hill, Chapel Hill, NC 27514, USA,

<sup>10</sup> Current address: Department of Pathology, University of Iowa Hospitals and Clinics, Iowa City, IA 52242, USA

**Corresponding author:** Sean Ekins, Ph.D., D.Sc., Collaborations in Chemistry, 601 Runnymede Avenue, Jenkintown, PA 19046. Phone 215-687-1320; Fax 215-481-0159;

\* Email [ekinssean@yahoo.com](mailto:ekinssean@yahoo.com)

**Table S3. Test set [7] prediction with Bayesian model (activator = EC<sub>50</sub> < 100 μM, non-activator = EC<sub>50</sub> > 100 μM).**

| Molecule       | classification | PXR n119 FCFP6<br>BayesianTempModel |
|----------------|----------------|-------------------------------------|
| Morphine       | n              | 9.873                               |
| Oxycodone      | n              | 8.986                               |
| Cdd3508        | a              | 8.873                               |
| Nabumetone     | a              | 8.454                               |
| Reserpine      | a              | 8.018                               |
| Venlafaxine    | n              | 7.649                               |
| Doxepin        | n              | 7.553                               |
| Amitriptyline  | n              | 7.544                               |
| Naloxone       | a              | 7.43                                |
| Zolpidem       | a              | 7.271                               |
| Diltiazem      | a              | 6.722                               |
| Oxcarbazepine  | a              | 5.724                               |
| Midazolam      | a              | 5.706                               |
| Triazolam      | a              | 5.677                               |
| Efavirenz      | a              | 5.668                               |
| Omeprazole     | a              | 5.455                               |
| Carbamazepine  | a              | 5.369                               |
| Naproxen       | n              | 5.29                                |
| Cdd3501        | a              | 5.266                               |
| Ondansetron    | a              | 5.166                               |
| Terbinafine    | a              | 4.985                               |
| Cdd3536        | a              | 4.978                               |
| Tacrine        | n              | 4.935                               |
| Cdd3543        | a              | 4.766                               |
| Cdd3538        | a              | 4.766                               |
| Phenylbutazone | a              | 4.735                               |
| Raloxifene     | a              | 4.54                                |
| Metoprolol     | n              | 4.434                               |
| Ibuprofen      | n              | 4.395                               |
| C2ba-11        | n              | 4.372                               |
| Cdd3540        | a              | 4.367                               |
| Bergamottin    | a              | 4.357                               |
| Loratadine     | a              | 4.284                               |
| Acetaminophen  | n              | 4.176                               |
| Ketoconazole   | n              | 4.151                               |
| C2ba-12        | n              | 4.096                               |
| Cdd3530        | a              | 4.053                               |
| Cdd3532        | a              | 4.053                               |
| C2ba-6         | a              | 3.914                               |
| Rosiglitazone  | a              | 3.886                               |

|                    |   |       |
|--------------------|---|-------|
| C2ba-10            | a | 3.757 |
| Mycophenolic Acid  | n | 3.686 |
| Theophylline       | n | 3.626 |
| Gemfibrozil        | n | 3.496 |
| Nevirapine         | n | 3.402 |
| Pioglitazone       | a | 3.394 |
| Flurbiprofen       | a | 3.303 |
| C2ba-7             | a | 3.283 |
| Paroxetine         | n | 3.24  |
| Haloperidol        | a | 3.097 |
| Diclofenac         | a | 3.087 |
| Chlorpromazine     | n | 3.069 |
| Desipramine        | n | 2.702 |
| Montelukast Sodium | a | 2.7   |
| Lansoprazole       | a | 2.448 |
| Fluconazole        | n | 2.401 |
| Rifapentine        | a | 2.36  |
| Simvastatin        | a | 2.255 |
| Dapsone            | n | 2.143 |
| C2ba-248           | a | 2.085 |
| Meclizine          | a | 1.961 |
| C2ba-8             | a | 1.922 |
| Tolmetin           | n | 1.642 |
| Sildenafil         | a | 1.623 |
| Meloxicam          | a | 1.528 |
| C2ba-9             | n | 1.362 |
| Levofloxacin       | n | 1.353 |
| Lamotrigine        | n | 1.255 |
| Rabeprazole Sodium | a | 1.223 |
| Risperidone        | n | 1.192 |
| Tocainide          | n | 1.172 |
| Flutamide          | a | 1.035 |
| Doxorubicin        | n | 0.922 |
| Rifabutin          | a | 0.919 |
| Felodipine         | a | 0.858 |
| Albuterol          | n | 0.805 |
| Etodolac           | n | 0.777 |
| Celecoxib          | a | 0.75  |
| Bupropion          | a | 0.684 |
| Nicardipine        | a | 0.629 |
| Zomitriptan        | n | 0.493 |
| Atenolol           | n | 0.49  |
| Metronidazole      | n | 0.415 |
| Topotecan          | a | 0.219 |
| Valsartan          | n | 0.056 |
| C2ba-3             | n | 0.043 |

|                      |   |         |
|----------------------|---|---------|
| C2ba-13              | a | -0.13   |
| Nadolol              | n | -0.137  |
| Quinapril            | a | -0.206  |
| Terazosin            | n | -0.21   |
| C2ba-251             | a | -0.327  |
| Propranolol          | n | -0.489  |
| Amlodipine           | a | -1.032  |
| Enalapril            | n | -1.062  |
| Doxazosin            | n | -1.089  |
| Sumatriptan          | n | -1.557  |
| Etoposide            | a | -1.731  |
| Isotretinoin         | a | -1.816  |
| Ranitidine           | n | -1.875  |
| Glimepiride          | a | -2.077  |
| Mevastatin           | a | -2.279  |
| Timolol              | n | -2.286  |
| Azithromycin         | n | -2.459  |
| Ethosuximide         | n | -2.648  |
| Forskolin            | a | -2.905  |
| Valproic Acid        | a | -3.144  |
| C2ba-5               | a | -3.159  |
| Linezolid            | n | -3.175  |
| Captopril            |   | -3.35   |
| Famotidine           | n | -3.39   |
| Ciprofloxacin        | n | -3.513  |
| Furosemide           | n | -3.686  |
| Fexofenadine         | n | -3.892  |
| Erythromycin         | n | -3.939  |
| Clarithromycin       | n | -3.962  |
| 1-9-Dideoxydorskolin | a | -3.975  |
| Fluvastatin          | n | -4.252  |
| Cyclophosphamide     | a | -4.665  |
| Cimetidine           | n | -5.13   |
| Budesonide           | a | -5.486  |
| Acyclovir            | n | -5.508  |
| Lisinopril           | n | -5.702  |
| Cholecalciferol      | n | -14.308 |
