# Supplementary material for: Challenges Predicting Ligand-Receptor Interactions of Promiscuous Proteins: The Nuclear Receptor PXR
Source: PubMed Central journal article supplement (PMC2781111; doi:10.1371/journal.pcbi.1000594), 2009-12-11
Supplement: pcbi.1000594.s004.pdf [file pcbi.1000594.s004.pdf]

## **Challenges Predicting Ligand-Receptor Interactions of Promiscuous Proteins:**

### **The Nuclear Receptor PXR**

Sean Ekins<sup>1,2,3\*</sup>, Sandhya Kortagere<sup>4</sup>, Manisha Iyer<sup>5</sup>, Erica J. Reschly<sup>5</sup>, Markus A. Lill<sup>6</sup>, Matthew R. Redinbo<sup>7,8,9</sup> and Matthew D. Krasowski<sup>5,10</sup>.

<sup>1</sup>Collaborations in Chemistry, 601 Runnymede Avenue, Jenkintown, PA 19046, USA

<sup>2</sup>Department of Pharmaceutical Sciences, University of Maryland, 20 Penn Street, Baltimore, MD 21201, USA

<sup>3</sup>Department of Pharmacology, University of Medicine & Dentistry of New Jersey (UMDNJ)- Robert Wood Johnson Medical School, 675 Hoes lane, Piscataway, NJ 08854, USA

<sup>4</sup>Department of Microbiology and Immunology, Drexel University College of Medicine, Philadelphia, PA 19129, USA.

<sup>5</sup>Department of Pathology, University of Pittsburgh, Pittsburgh, PA, 15261, USA

<sup>6</sup>Department of Medicinal Chemistry and Molecular Pharmacology, Purdue University, West Lafayette, IN 47907, USA.

<sup>7</sup>Department of Chemistry, University of North Carolina at Chapel Hill, Chapel Hill, NC, 27599, USA,

<sup>8</sup>Department of Biochemistry and Biophysics, University of North Carolina at Chapel Hill, Chapel Hill, NC 27599, USA,

<sup>9</sup>The Lineberger Comprehensive Cancer Center, University of North Carolina at Chapel Hill, Chapel Hill, NC 27514, USA,

<sup>10</sup> Current address: Department of Pathology, University of Iowa Hospitals and Clinics, Iowa City, IA 52242, USA

**Corresponding author:** Sean Ekins, Ph.D., D.Sc., Collaborations in Chemistry, 601 Runnymede Avenue, Jenkintown, PA 19046. Phone 215-687-1320; Fax 215-481-0159;

\* Email [ekinssean@yahoo.com](mailto:ekinssean@yahoo.com)

**Table S4** – CoMFA Test Set Predictions

|                                                                  | Observed.<br>Activity | Predicted<br>Activity |
|------------------------------------------------------------------|-----------------------|-----------------------|
| Androstenedione                                                  | 4.69                  | 5.06                  |
| 11-Ketoetiocholanone                                             | 4.39                  | 5.19                  |
| Epitestosterone sulfate                                          | 5.47                  | 3.97                  |
| 5 $\alpha$ -Androstane                                           | 2.00                  | 5.71                  |
| 4,16-Androstadien-3-one                                          | 5.15                  | 5.38                  |
| Corticosterone                                                   | 5.00                  | 4.82                  |
| Cortisone                                                        | 4.16                  | 2.92                  |
| Pregnenolone                                                     | 5.64                  | 3.42                  |
| Pregnanediol glucuronide                                         | 4.26                  | 4.64                  |
| 17 $\alpha$ ,20 $\beta$ -Dihydroxyprogesterone                   | 2.00                  | 5.35                  |
| Dexamethasone                                                    | 4.39                  | 5.23                  |
| Chenodeoxycholic acid                                            | 2.00                  | 4.08                  |
| Glycodeoxycholic acid                                            | 2.00                  | 3.13                  |
| Taurocholic acid                                                 | 2.00                  | 2.06                  |
| 5 $\beta$ -cholestan-3 $\alpha$ ,7 $\alpha$ ,12 $\alpha$ ,-triol | 2.00                  | 2.94                  |
| 23-Nordeoxycholic acid                                           | 4.79                  | 4.55                  |
| Petromyzonol sulfate                                             | 4.55                  | 1.41                  |
| Scymnol – sulfated                                               | 4.31                  | 2.70                  |
| Taurolithocholic acid 3-sulfate, disodium salt                   | 4.08                  | 5.14                  |
| $\alpha$ -Cholestanol                                            | 2.00                  | 3.50                  |
