# Supplementary material for: Challenges Predicting Ligand-Receptor Interactions of Promiscuous Proteins: The Nuclear Receptor PXR
Source: PubMed Central journal article supplement (PMC2781111; doi:10.1371/journal.pcbi.1000594), 2009-12-11
Supplement: pcbi.1000594.s005.pdf [file pcbi.1000594.s005.pdf]

## **Challenges Predicting Ligand-Receptor Interactions of Promiscuous Proteins:**

### **The Nuclear Receptor PXR**

Sean Ekins<sup>1,2,3\*</sup>, Sandhya Kortagere<sup>4</sup>, Manisha Iyer<sup>5</sup>, Erica J. Reschly<sup>5</sup>, Markus A. Lill<sup>6</sup>, Matthew R. Redinbo<sup>7,8,9</sup> and Matthew D. Krasowski<sup>5,10</sup>.

<sup>1</sup>Collaborations in Chemistry, 601 Runnymede Avenue, Jenkintown, PA 19046, USA

<sup>2</sup>Department of Pharmaceutical Sciences, University of Maryland, 20 Penn Street, Baltimore, MD 21201, USA

<sup>3</sup>Department of Pharmacology, University of Medicine & Dentistry of New Jersey (UMDNJ)- Robert Wood Johnson Medical School, 675 Hoes lane, Piscataway, NJ 08854, USA

<sup>4</sup>Department of Microbiology and Immunology, Drexel University College of Medicine, Philadelphia, PA 19129, USA.

<sup>5</sup>Department of Pathology, University of Pittsburgh, Pittsburgh, PA, 15261, USA

<sup>6</sup>Department of Medicinal Chemistry and Molecular Pharmacology, Purdue University, West Lafayette, IN 47907, USA.

<sup>7</sup>Department of Chemistry, University of North Carolina at Chapel Hill, Chapel Hill, NC, 27599, USA,

<sup>8</sup>Department of Biochemistry and Biophysics, University of North Carolina at Chapel Hill, Chapel Hill, NC 27599, USA,

<sup>9</sup>The Lineberger Comprehensive Cancer Center, University of North Carolina at Chapel Hill, Chapel Hill, NC 27514, USA,

<sup>10</sup> Current address: Department of Pathology, University of Iowa Hospitals and Clinics, Iowa City, IA 52242, USA

**Corresponding author:** Sean Ekins, Ph.D., D.Sc., Collaborations in Chemistry, 601 Runnymede Avenue, Jenkintown, PA 19046. Phone 215-687-1320; Fax 215-481-0159;

\* Email [ekinssean@yahoo.com](mailto:ekinssean@yahoo.com)

**Table S5.** To identify which outliers are bringing down the  $XV-R^2$  of the CoMFA model, the following table lists the activities as predicted by the cross-validated PLS model: The standard deviation of the residuals in the following table is 0.825, and accordingly, the two possible outliers are highlighted in bold. The two outliers are the only two inactives in the training set.

|      |                                                 | Exp.<br>Activity | Pred.<br>Activity | Residual     |
|------|-------------------------------------------------|------------------|-------------------|--------------|
| AN01 | 17 $\beta$ -dihydroandrosterone                 | 5.38             | 5.49              | 0.108        |
| AN02 | Androstanedione                                 | 4.90             | 5.13              | 0.234        |
| AN03 | Androstanol                                     | 5.20             | 5.43              | 0.227        |
| AN04 | Androsterone                                    | 4.73             | 4.71              | -0.020       |
| AN05 | Dihydrotestosterone                             | 4.94             | 5.24              | 0.297        |
| AN06 | Etiocholanolone                                 | 5.24             | 4.79              | -0.454       |
| AN08 | Testosterone                                    | 4.14             | 4.42              | 0.277        |
| AN09 | DHEA                                            | 4.49             | 3.51              | -0.978       |
| AN10 | Androstenol                                     | 5.26             | 4.87              | -0.390       |
| AN11 | 11 $\beta$ -<br>Hydroxyetiocholanolone          | 4.72             | 5.42              | 0.703        |
| AN12 | DHEA sulfate (sodium salt)                      | 4.32             | 4.65              | 0.333        |
| AN13 | Epiandrosterone                                 | 5.31             | 5.11              | -0.199       |
| AN15 | Epitestosterone                                 | 4.17             | 3.75              | -0.417       |
| AN16 | Epitestosterone glucuronide                     | 4.86             | 4.71              | -0.150       |
| AN18 | <i>Etiocholanolone<br/>glucuronide</i>          | <b>2.00</b>      | <b>4.19</b>       | <b>2.190</b> |
| AN20 | 5 $\alpha$ -Androstan-3 $\beta$ -ol             | 6.10             | 5.56              | -0.537       |
| AN21 | 16,(5 $\alpha$ )-Androsten-3 $\beta$ -ol        | 5.32             | 6.08              | 0.759        |
| AN22 | 16,(5 $\alpha$ )-Androsten-3-one                | 5.52             | 5.15              | -0.373       |
| AN23 | 5 $\beta$ -Androstan-3 $\alpha$ -ol             | 5.85             | 5.27              | -0.581       |
| AN25 | <i>5,16-Androstadien-3<math>\beta</math>-ol</i> | <b>2.00</b>      | <b>4.21</b>       | <b>2.210</b> |
