# Supplementary material for: Challenges Predicting Ligand-Receptor Interactions of Promiscuous Proteins: The Nuclear Receptor PXR
Source: PubMed Central journal article supplement (PMC2781111; doi:10.1371/journal.pcbi.1000594), 2009-12-11
Supplement: pcbi.1000594.s006.pdf [file pcbi.1000594.s006.pdf]

## **Challenges Predicting Ligand-Receptor Interactions of Promiscuous Proteins:**

### **The Nuclear Receptor PXR**

Sean Ekins<sup>1,2,3\*</sup>, Sandhya Kortagere<sup>4</sup>, Manisha Iyer<sup>5</sup>, Erica J. Reschly<sup>5</sup>, Markus A. Lill<sup>6</sup>, Matthew R. Redinbo<sup>7,8,9</sup> and Matthew D. Krasowski<sup>5,10</sup>.

<sup>1</sup>Collaborations in Chemistry, 601 Runnymede Avenue, Jenkintown, PA 19046, USA

<sup>2</sup>Department of Pharmaceutical Sciences, University of Maryland, 20 Penn Street, Baltimore, MD 21201, USA

<sup>3</sup>Department of Pharmacology, University of Medicine & Dentistry of New Jersey (UMDNJ)- Robert Wood Johnson Medical School, 675 Hoes lane, Piscataway, NJ 08854, USA

<sup>4</sup>Department of Microbiology and Immunology, Drexel University College of Medicine, Philadelphia, PA 19129, USA.

<sup>5</sup>Department of Pathology, University of Pittsburgh, Pittsburgh, PA, 15261, USA

<sup>6</sup>Department of Medicinal Chemistry and Molecular Pharmacology, Purdue University, West Lafayette, IN 47907, USA.

<sup>7</sup>Department of Chemistry, University of North Carolina at Chapel Hill, Chapel Hill, NC, 27599, USA,

<sup>8</sup>Department of Biochemistry and Biophysics, University of North Carolina at Chapel Hill, Chapel Hill, NC 27599, USA,

<sup>9</sup>The Lineberger Comprehensive Cancer Center, University of North Carolina at Chapel Hill, Chapel Hill, NC 27514, USA,

<sup>10</sup> Current address: Department of Pathology, University of Iowa Hospitals and Clinics, Iowa City, IA 52242, USA

**Corresponding author:** Sean Ekins, Ph.D., D.Sc., Collaborations in Chemistry, 601 Runnymede Avenue, Jenkintown, PA 19046. Phone 215-687-1320; Fax 215-481-0159;

\* Email [ekinssean@yahoo.com](mailto:ekinssean@yahoo.com)

**Table S6** CoMFA outlier analysis (Bold = outliers).

|      |                                                               | Exp.<br>Activity | Pred.<br>Activity | Residual      |
|------|---------------------------------------------------------------|------------------|-------------------|---------------|
| PR1  | Pregnanediol                                                  | 5.29             | 5.67              | 0.378         |
| PR2  | Pregnanedione                                                 | 5.59             | 5.36              | -0.225        |
| PR4  | Cortexolone                                                   | 4.64             | 5.09              | 0.452         |
| PR5  | Aldosterone                                                   | 4.26             | 4.74              | 0.480         |
| PR7  | Progesterone                                                  | 4.83             | 5.08              | 0.247         |
| PR8  | 17-Hydroxyprogesterone                                        | 4.75             | 4.91              | 0.158         |
| PR9  | Cortexone                                                     | 5.61             | 4.64              | -0.973        |
| PR10 | Cortisol                                                      | 4.32             | 4.49              | 0.168         |
| PR11 | <i>17-Hydroxypregnenolone</i>                                 | <b>4.47</b>      | <b>2.47</b>       | <b>-2.005</b> |
| PR13 | Pregnenolone carbonitrile (PCN)                               | <b>2.00</b>      | <b>3.47</b>       | <b>1.470</b>  |
| PR14 | Allopregnanolone                                              | 5.38             | 4.52              | -0.856        |
| PR15 | Allopregnanediol                                              | 4.28             | 5.01              | 0.730         |
| PR17 | Cortol                                                        | 4.33             | 4.71              | 0.384         |
| PR18 | Cortolone                                                     | 4.35             | 4.18              | -0.170        |
| PR19 | Tetrahydrocortisone                                           | 4.28             | 4.26              | -0.018        |
| PR20 | THDOC                                                         | 4.90             | 4.78              | -0.123        |
| PR22 | 17 $\alpha$ ,20 $\beta$ -Dihydroxyprogesterone sodium sulfate | 5.73             | 5.07              | -0.656        |
| PR23 | 5 $\beta$ -Pregnan-3 $\alpha$ ,20 $\beta$ ,diol               | 5.42             | 5.48              | 0.061         |
| PR24 | Tetrahydrocortisol                                            | 4.33             | 4.10              | -0.233        |
| PR25 | Pregnanolone                                                  | 4.98             | 5.04              | 0.057         |
| PR26 | Pregnenolone sulfate                                          | 2.00             | 2.79              | 0.790         |
| PR27 | Levonorgestrol                                                | 5.37             | 6.11              | 0.743         |
| PR28 | Norethindrone                                                 | 4.59             | 4.14              | -0.452        |
