# Supplementary material for: Challenges Predicting Ligand-Receptor Interactions of Promiscuous Proteins: The Nuclear Receptor PXR
Source: PubMed Central journal article supplement (PMC2781111; doi:10.1371/journal.pcbi.1000594), 2009-12-11
Supplement: pcbi.1000594.s008.pdf [file pcbi.1000594.s008.pdf]

## **Challenges Predicting Ligand-Receptor Interactions of Promiscuous Proteins:**

### **The Nuclear Receptor PXR**

Sean Ekins<sup>1,2,3\*</sup>, Sandhya Kortagere<sup>4</sup>, Manisha Iyer<sup>5</sup>, Erica J. Reschly<sup>5</sup>, Markus A. Lill<sup>6</sup>, Matthew R. Redinbo<sup>7,8,9</sup> and Matthew D. Krasowski<sup>5,10</sup>.

<sup>1</sup>Collaborations in Chemistry, 601 Runnymede Avenue, Jenkintown, PA 19046, USA

<sup>2</sup>Department of Pharmaceutical Sciences, University of Maryland, 20 Penn Street, Baltimore, MD 21201, USA

<sup>3</sup>Department of Pharmacology, University of Medicine & Dentistry of New Jersey (UMDNJ)- Robert Wood Johnson Medical School, 675 Hoes lane, Piscataway, NJ 08854, USA

<sup>4</sup>Department of Microbiology and Immunology, Drexel University College of Medicine, Philadelphia, PA 19129, USA.

<sup>5</sup>Department of Pathology, University of Pittsburgh, Pittsburgh, PA, 15261, USA

<sup>6</sup>Department of Medicinal Chemistry and Molecular Pharmacology, Purdue University, West Lafayette, IN 47907, USA.

<sup>7</sup>Department of Chemistry, University of North Carolina at Chapel Hill, Chapel Hill, NC, 27599, USA,

<sup>8</sup>Department of Biochemistry and Biophysics, University of North Carolina at Chapel Hill, Chapel Hill, NC 27599, USA,

<sup>9</sup>The Lineberger Comprehensive Cancer Center, University of North Carolina at Chapel Hill, Chapel Hill, NC 27514, USA,

<sup>10</sup> Current address: Department of Pathology, University of Iowa Hospitals and Clinics, Iowa City, IA 52242, USA

**Corresponding author:** Sean Ekins, Ph.D., D.Sc., Collaborations in Chemistry, 601 Runnymede Avenue, Jenkintown, PA 19046. Phone 215-687-1320; Fax 215-481-0159;

\* Email [ekinssean@yahoo.com](mailto:ekinssean@yahoo.com)

**Table S8.** Best model training set correlation (r) values and model statistics (total cost and null cost) for Catalyst Hypothesis hypotheses.

| Compounds    | Without excluded volumes | 2 excluded volumes | Variable weight/tolerance | 2 excluded volumes and variable weight/tolerance |
|--------------|--------------------------|--------------------|---------------------------|--------------------------------------------------|
| Bile Acids   | 0.65 (302.4 – 371.9)     | 0.79 (272.5-371.9) | 0.71 (314.0-371.9)        | 0.81 (294.5-371.9)                               |
| Estratrienes | 0.84 (73.9-82.8)         | 0.86 (66.9-82.8)   | 0.84 (96.3-82.8)          | 0.92 (89.5-82.8)                                 |
| Androstanes  | 0.75 (127.7-149.2)       | 0.75 (127.7-149.2) | 0.83 (141.7-149.2)        | 0.83 (141.7-149.2)                               |
| Pregnanes    | 0.62 (150.2-159.6)       | 0.81 (141.9-159.6) | 0.83 (159.2-159.6)        | 0.92 (153 – 159.6)                               |
