# Supplementary material for: Challenges Predicting Ligand-Receptor Interactions of Promiscuous Proteins: The Nuclear Receptor PXR
Source: PubMed Central journal article supplement (PMC2781111; doi:10.1371/journal.pcbi.1000594), 2009-12-11
Supplement: pcbi.1000594.s011.pdf [file pcbi.1000594.s011.pdf]

## **Challenges Predicting Ligand-Receptor Interactions of Promiscuous Proteins:**

### **The Nuclear Receptor PXR**

Sean Ekins<sup>1,2,3\*</sup>, Sandhya Kortagere<sup>4</sup>, Manisha Iyer<sup>5</sup>, Erica J. Reschly<sup>5</sup>, Markus A. Lill<sup>6</sup>, Matthew R. Redinbo<sup>7,8,9</sup> and Matthew D. Krasowski<sup>5,10</sup>.

<sup>1</sup>Collaborations in Chemistry, 601 Runnymede Avenue, Jenkintown, PA 19046, USA

<sup>2</sup>Department of Pharmaceutical Sciences, University of Maryland, 20 Penn Street, Baltimore, MD 21201, USA

<sup>3</sup>Department of Pharmacology, University of Medicine & Dentistry of New Jersey (UMDNJ)- Robert Wood Johnson Medical School, 675 Hoes lane, Piscataway, NJ 08854, USA

<sup>4</sup>Department of Microbiology and Immunology, Drexel University College of Medicine, Philadelphia, PA 19129, USA.

<sup>5</sup>Department of Pathology, University of Pittsburgh, Pittsburgh, PA, 15261, USA

<sup>6</sup>Department of Medicinal Chemistry and Molecular Pharmacology, Purdue University, West Lafayette, IN 47907, USA.

<sup>7</sup>Department of Chemistry, University of North Carolina at Chapel Hill, Chapel Hill, NC, 27599, USA,

<sup>8</sup>Department of Biochemistry and Biophysics, University of North Carolina at Chapel Hill, Chapel Hill, NC 27599, USA,

<sup>9</sup>The Lineberger Comprehensive Cancer Center, University of North Carolina at Chapel Hill, Chapel Hill, NC 27514, USA,

<sup>10</sup> Current address: Department of Pathology, University of Iowa Hospitals and Clinics, Iowa City, IA 52242, USA

**Corresponding author:** Sean Ekins, Ph.D., D.Sc., Collaborations in Chemistry, 601 Runnymede Avenue, Jenkintown, PA 19046. Phone 215-687-1320; Fax 215-481-0159;

\* Email [ekinssean@yahoo.com](mailto:ekinssean@yahoo.com)

**Table S11.** Experimental versus predicted pEC<sub>50</sub> values for 115 compounds binding to PXR divided into four different substrate classes – 5D-QSAR

| Compound name                  | Experimental EC <sub>50</sub> (μM) | Predicted EC <sub>50</sub> (μM) | Test set |
|--------------------------------|------------------------------------|---------------------------------|----------|
| <b>ANDROSTANES</b>             |                                    |                                 |          |
| 17b-dihydroandrosterone        | 4.15                               | 12.5                            |          |
| Androstanedione                | 12.7                               | 4.39                            |          |
| Androstanol                    | 6.27                               | 7.87                            |          |
| Androsterone                   | 18.6                               | 5.80                            |          |
| Dihydrotestosterone            | 11.4                               | 5.79                            |          |
| Etiocholanolone                | 5.7                                | 4.16                            |          |
| <b>Androstenedione</b>         | <b>20.6</b>                        | 8.22                            | x        |
| Testosterone                   | 71.9                               | 13.8                            |          |
| DHEA                           | 32.5                               | 12.5                            |          |
| Androstenol                    | 5.5                                | 9.28                            |          |
| 11b-Hydroxyetiocholanolone     | 19.2                               | 8.71                            |          |
| DHEA sulfate (sodium salt)     | 48.2                               | 12.3                            |          |
| Epiandrosterone                | 4.91                               | 9.08                            |          |
| <b>11-Ketoetiocholanone</b>    | <b>41.1</b>                        | 14.8                            | x        |
| Epitestosterone                | 68                                 | 47.8                            |          |
| Epitestosterone glucuronide    | 13.8                               | 7.10                            |          |
| <b>Epitestosterone sulfate</b> | <b>3.39</b>                        | 7.53                            | x        |
| Etiocholanolone glucuronide    | 10000                              | 159                             |          |
| <b>5a-Androstane</b>           | <b>10000</b>                       | 2.18                            | x        |
| 5a-Androstan-3b-ol             | 0.8                                | 3.21                            |          |
| 16,(5a)-Androsten-3b-ol        | 4.77                               | 6.31                            |          |
| 16,(5a)-Androsten-3-one        | 3                                  | 4.17                            |          |
| 5b-Androstan-3a-ol             | 1.41                               | 3.16                            |          |
| <b>4,16-Androstadien-3-one</b> | <b>7.1</b>                         | 10.24                           | x        |
| 5,16-Androstadien-3b-ol        | 10000                              | 16.32                           |          |
| <b>PREGNANES</b>               |                                    |                                 |          |
| Pregnanediol                   | 5.1                                | 9.26                            |          |
| Pregnanedione                  | 2.6                                | 2.49                            |          |
| <b>Corticosterone</b>          | <b>9.95</b>                        | 9.85                            | x        |
| Cortexolone                    | 23                                 | 28.8                            |          |
| Aldosterone                    | 55                                 | 102                             |          |
| <b>Cortisone</b>               | <b>69.4</b>                        | 93.3                            | x        |
| Progesterone                   | 14.7                               | 5.50                            |          |
| 17-Hydroxyprogesterone         | 17.7                               | 6.31                            |          |
| Cortexone                      | 2.44                               | 7.93                            |          |
| Cortisol                       | 47.6                               | 21.8                            |          |
| 17-Hydroxypregnenolone         | 33.5                               | 13.6                            |          |
| <b>Pregnenolone</b>            | <b>2.3</b>                         | 8.65                            | x        |

|                                                 |              |       |   |
|-------------------------------------------------|--------------|-------|---|
| Pregnenolone carbonitrile (PCN)                 | 10000        | 20.5  |   |
| Allopregnanolone                                | 4.21         | 3.72  |   |
| Allopregnenediol                                | 52.5         | 9.38  |   |
| <b>Pregnanediol glucuronide</b>                 | <b>55.1</b>  | 196   | x |
| Cortol                                          | 47.2         | 43.4  |   |
| Cortolone                                       | 44.7         | 96.4  |   |
| Tetrahydrocortisone                             | 52.7         | 65.8  |   |
| THDOC                                           | 12.5         | 38.7  |   |
| <b>17a,20b-Dihydroxyprogesterone</b>            | <b>10000</b> | 152   | x |
| 17a,20b-Dihydroxyprogesterone sodium sulfate    | 1.88         | 4.15  |   |
| 5b-Pregnan-3a,20b,diol                          | 3.81         | 2.97  |   |
| Tetrahydrocortisol                              | 46.5         | 28.4  |   |
| Pregnanolone                                    | 10.4         | 6.38  |   |
| Pregnenolone sulfate                            | 10000        | 37.2  |   |
| Levonorgestrol                                  | 4.30         | 11.1  |   |
| Norethindrone                                   | 25.60        | 74.7  |   |
| <b>Dexamethasone</b>                            | <b>41.00</b> | 40.5  | x |
| <b>ESTRADIENES</b>                              |              |       |   |
| Estradiol                                       | 16           | 4.05  |   |
| Estrone                                         | 37.9         | 7.82  |   |
| Estriol                                         | 10000        | 23.3  |   |
| 16a-Hydroxysterone                              | 2.5          | 11.0  |   |
| 4-Methoxysterone                                | 4            | 11.6  |   |
| Estetrol                                        | 2.14         | 3.13  |   |
| 2-Hydroxysterone                                | 3.6          | 11.8  |   |
| Estrone 3-sulfate                               | 3.4          | 4.17  |   |
| Estradiol glucuronide                           | 10000        | 42.1  |   |
| Estradiol 3-sulfate                             | 0.89         | 1.918 |   |
| Ethinyl estradiol                               | 1.9          | 6.33  |   |
| <b>BILE ACIDS</b>                               |              |       |   |
| 5b-Cholan-3a,7a,12a,24-tetrol (5b-Petromyzonol) | 10000        | 337   |   |
| Hyodeoxycholic acid                             | 38.1         | 32.5  |   |
| Taurohyodeoxycholic acid                        | 19           | 19.3  |   |
| Murocholic acid (Murideoxycholic acid)          | 10000        | 26.1  |   |
| <b>Chenodeoxycholic acid</b>                    | <b>10000</b> | 15.1  | x |
| Glycochenodeoxycholic acid                      | 10000        | 80.6  |   |
| Taurochenodeoxycholic acid                      | 104          | 148   |   |
| Deoxycholic acid                                | 50.2         | 31.2  |   |
| <b>Glycodeoxycholic acid</b>                    | <b>10000</b> | 88.4  | x |
| Taurodeoxycholic acid                           | 10000        | 150   |   |
| Lithocholic acid                                | 10           | 6.22  |   |
| Glycolithocholic acid                           | 16.1         | 7.60  |   |
| <b>Taurolithocholic acid</b>                    | <b>19.8</b>  | 8.20  | x |
| 7,12-Diketolithocholic acid                     | 35.5         | 36.6  |   |
| 7-Ketolithocholic acid                          | 21.5         | 17.9  |   |

|                                                                       |              |      |   |
|-----------------------------------------------------------------------|--------------|------|---|
| 12-Ketolithocholic acid                                               | 31.3         | 12.6 |   |
| w-Muricholic acid                                                     | 10000        | 117  |   |
| a-Muricholic acid                                                     | 56           | 65.0 |   |
| b-Muricholic acid                                                     | 10000        | 76.0 |   |
| Cholic acid                                                           | 11.6         | 35.9 |   |
| Glycocholic acid                                                      | 10000        | 124  |   |
| Taurocholic acid                                                      | 10000        | 737  |   |
| <b>5b-cholestan-3a,7a,12a-triol</b>                                   | <b>10000</b> | 471  | x |
| 20a-hydroxycholesterol                                                | 10000        | 394  |   |
| Cholesterol                                                           | 10000        | 146  |   |
| <b>23-Nordeoxycholic acid</b>                                         | <b>16.4</b>  | 12.3 | x |
| 23-Norcholic acid                                                     | 96           | 29.9 |   |
| 3-Ketopetromyzonol                                                    | 10000        | 255  |   |
| Petromyzonol                                                          | 10000        | 180  |   |
| <b>Petromyzonol sulfate</b>                                           | <b>28.1</b>  | 47.1 | x |
| Allocholic acid                                                       | 10000        | 28.6 |   |
| 7,12-Dihydroxy-5-cholan-3-one-24-sulfate (3-Ketopetromyzonol sulfate) | 10000        | 54.5 |   |
| 3-Keto-7a,12a-dihydroxy-5a-cholanic acid                              | 12.1         | 32.0 |   |
| <b>Scymnol - sulfated</b>                                             | <b>49.3</b>  | 194  | x |
| Scymnol - desulfated                                                  | 10000        | 8814 |   |
| 5a-cyprinol - sulfated                                                | 25.9         | 19.2 |   |
| 5a-cyprinol - desulfated                                              | 10000        | 754  |   |
| Alligator bile acid                                                   | 10000        | 398  |   |
| Myxinol - sulfated                                                    | 10000        | 835  |   |
| Myxinol - desulfated                                                  | 10000        | 1727 |   |
| Lithocholic acid 3-sulfate                                            | 117.9        | 21.0 |   |
| 7-Ketodeoxycholic acid                                                | 58.2         | 74.0 |   |
| Glycolithocholic acid 3-sulfate, disodium salt                        | 56.2         | 53.5 |   |
| <b>Tauroolithocholic acid 3-sulfate, disodium salt</b>                | <b>83.2</b>  | 63.8 | x |
| a-Cholestanol                                                         | 10000        | 92.3 |   |
| Tauro-b-muricholic acid                                               | 10000        | 917  |   |
| 7a-Hydroxycholesterol                                                 | 10000        | 219  |   |
| <b>3-Ketolithocholic acid</b>                                         | <b>8.3</b>   | 9.44 | x |
| Lithocholic acid acetate                                              | 1.2          | 1.42 |   |
| Lithocholic acid acetate methyl ester                                 | 1.1          | 4.24 |   |
