# Supplementary material for: Challenges Predicting Ligand-Receptor Interactions of Promiscuous Proteins: The Nuclear Receptor PXR
Source: PLoS Comput Biol. 2009 Dec 11;5(12):e1000594. doi: 10.1371/journal.pcbi.1000594 (PMC2781111; doi:10.1371/journal.pcbi.1000594)
Supplement: Table S1 — Molecular descriptors for PXR crystal structure ligands calculated with Discovery Studio ver 2.1 (Accelrys, San Diego, CA). (0.01 MB PDF) [file pcbi.1000594.s001.pdf]

## **Challenges Predicting Ligand-Receptor Interactions of Promiscuous Proteins:**

### **The Nuclear Receptor PXR**

Sean Ekins<sup>1,2,3\*</sup>, Sandhya Kortagere<sup>4</sup>, Manisha Iyer<sup>5</sup>, Erica J. Reschly<sup>5</sup>, Markus A. Lill<sup>6</sup>, Matthew R. Redinbo<sup>7,8,9</sup> and Matthew D. Krasowski<sup>5,10</sup>.

<sup>1</sup>Collaborations in Chemistry, 601 Runnymede Avenue, Jenkintown, PA 19046, USA

<sup>2</sup>Department of Pharmaceutical Sciences, University of Maryland, 20 Penn Street, Baltimore, MD 21201, USA

<sup>3</sup>Department of Pharmacology, University of Medicine & Dentistry of New Jersey (UMDNJ)- Robert Wood Johnson Medical School, 675 Hoes lane, Piscataway, NJ 08854, USA

<sup>4</sup>Department of Microbiology and Immunology, Drexel University College of Medicine, Philadelphia, PA 19129, USA.

<sup>5</sup>Department of Pathology, University of Pittsburgh, Pittsburgh, PA, 15261, USA

<sup>6</sup>Department of Medicinal Chemistry and Molecular Pharmacology, Purdue University, West Lafayette, IN 47907, USA.

<sup>7</sup>Department of Chemistry, University of North Carolina at Chapel Hill, Chapel Hill, NC, 27599, USA,

<sup>8</sup>Department of Biochemistry and Biophysics, University of North Carolina at Chapel Hill, Chapel Hill, NC 27599, USA,

<sup>9</sup>The Lineberger Comprehensive Cancer Center, University of North Carolina at Chapel Hill, Chapel Hill, NC 27514, USA,

<sup>10</sup> Current address: Department of Pathology, University of Iowa Hospitals and Clinics, Iowa City, IA 52242, USA

**Corresponding author:** Sean Ekins, Ph.D., D.Sc., Collaborations in Chemistry, 601 Runnymede Avenue, Jenkintown, PA 19046. Phone 215-687-1320; Fax 215-481-0159;

\* Email [ekinssean@yahoo.com](mailto:ekinssean@yahoo.com)

**Table S1.** Molecular descriptors for PXR crystal structure ligands calculated with Discovery Studio ver 2.1 (Accelrys, San Diego, CA). MWT = molecular weight, Rotl Bonds = number of rotatable bonds, HBA = hydrogen bond acceptor, HBD = hydrogen bond donor, Polar surface area = polar surface area.

| Compound   | ALogP | MWT    | Rotl. | Num_Aromatic |       | HBA  | HBD  | PSA    |
|------------|-------|--------|-------|--------------|-------|------|------|--------|
|            |       |        | Bonds | Num_Rings    | Rings |      |      |        |
| Estradiol  | 3.84  | 272.38 | 0     | 4            | 1     | 2    | 2    | 40.46  |
| T1317      | 4.84  | 491.41 | 8     | 2            | 0     | 3    | 1    | 65.99  |
| Colupulone | 6.03  | 400.55 | 8     | 1            | 0     | 4    | 2    | 74.60  |
| Hyperforin | 10.11 | 542.83 | 13    | 1            | 0     | 4    | 1    | 71.44  |
| Rifampicin | 3.55  | 713.81 | 3     | 4            | 1     | 12   | 6    | 201.30 |
| SR12813    | 4.89  | 504.53 | 13    | 1            | 1     | 7    | 1    | 110.91 |
| Mean       | 5.54  | 487.59 | 7.50  | 2.17         | 0.50  | 5.33 | 2.17 | 94.12  |
| SD         | 2.41  | 147.25 | 5.24  | 1.47         | 0.55  | 3.67 | 1.94 | 57.16  |
