# Supplementary material for: Challenges Predicting Ligand-Receptor Interactions of Promiscuous Proteins: The Nuclear Receptor PXR
Source: PLoS Comput Biol. 2009 Dec 11;5(12):e1000594. doi: 10.1371/journal.pcbi.1000594 (PMC2781111; doi:10.1371/journal.pcbi.1000594)
Supplement: Table S10 — External Validation test Set Predictions for 4D-QSAR (0.02 MB PDF) [file pcbi.1000594.s010.pdf]

## **Challenges Predicting Ligand-Receptor Interactions of Promiscuous Proteins:**

### **The Nuclear Receptor PXR**

Sean Ekins<sup>1,2,3\*</sup>, Sandhya Kortagere<sup>4</sup>, Manisha Iyer<sup>5</sup>, Erica J. Reschly<sup>5</sup>, Markus A. Lill<sup>6</sup>, Matthew R. Redinbo<sup>7,8,9</sup> and Matthew D. Krasowski<sup>5,10</sup>.

<sup>1</sup>Collaborations in Chemistry, 601 Runnymede Avenue, Jenkintown, PA 19046, USA

<sup>2</sup>Department of Pharmaceutical Sciences, University of Maryland, 20 Penn Street, Baltimore, MD 21201, USA

<sup>3</sup>Department of Pharmacology, University of Medicine & Dentistry of New Jersey (UMDNJ)-Robert Wood Johnson Medical School, 675 Hoes lane, Piscataway, NJ 08854, USA

<sup>4</sup>Department of Microbiology and Immunology, Drexel University College of Medicine, Philadelphia, PA 19129, USA.

<sup>5</sup>Department of Pathology, University of Pittsburgh, Pittsburgh, PA, 15261, USA

<sup>6</sup>Department of Medicinal Chemistry and Molecular Pharmacology, Purdue University, West Lafayette, IN 47907, USA.

<sup>7</sup>Department of Chemistry, University of North Carolina at Chapel Hill, Chapel Hill, NC, 27599, USA,

<sup>8</sup>Department of Biochemistry and Biophysics, University of North Carolina at Chapel Hill, Chapel Hill, NC 27599, USA,

<sup>9</sup>The Lineberger Comprehensive Cancer Center, University of North Carolina at Chapel Hill, Chapel Hill, NC 27514, USA,

<sup>10</sup> Current address: Department of Pathology, University of Iowa Hospitals and Clinics, Iowa City, IA 52242, USA

**Corresponding author:** Sean Ekins, Ph.D., D.Sc., Collaborations in Chemistry, 601 Runnymede Avenue, Jenkintown, PA 19046. Phone 215-687-1320; Fax 215-481-0159;

\* Email [ekinssean@yahoo.com](mailto:ekinssean@yahoo.com)

**Table S10.** External Validation test Set Predictions for 4D-QSAR ( $R^2 = 0.02$ ) (Bold = outliers).

| Compound                                                        | Experimental Activity | Predicted Activity |
|-----------------------------------------------------------------|-----------------------|--------------------|
| ANDROSTANES                                                     |                       |                    |
| Androstenedione                                                 | 4.69                  | 4.45               |
| 11-Ketoetiocholanone                                            | 4.39                  | 4.67               |
| Epitestosterone sulfate                                         | 5.47                  | 4.55               |
| 5 $\alpha$ -Androstane                                          | 2.00                  | 5.73               |
| 4,16-Androstadien-3-one                                         | 5.15                  | 3.74               |
| PREGNANES                                                       |                       |                    |
| Corticosterone                                                  | 5.00                  | 4.88               |
| Cortisone                                                       | 4.16                  | 4.31               |
| Pregnenolone                                                    | 5.64                  | 4.51               |
| Pregnanediol glucuronide                                        | 4.26                  | 5.07               |
| 17 $\alpha$ ,20 $\beta$ -Dihydroxyprogesterone                  | 2.00                  | 4.87               |
| Dexamethasone                                                   | 4.39                  | 2.63               |
| BILE ACIDS / SALTS                                              |                       |                    |
| Chenodeoxycholic acid                                           | 2.00                  | 3.88               |
| Glycodeoxycholic acid                                           | 2.00                  | 5.93               |
| Taurocholic acid                                                | 2.00                  | 2.71               |
| 5 $\beta$ -cholestan-3 $\alpha$ ,7 $\alpha$ ,12 $\alpha$ -triol | 2.00                  | 2.88               |
| 23-Nordeoxycholic acid                                          | 4.79                  | 5.40               |
| Petromyzonol sulfate                                            | 4.55                  | 3.37               |
| Scymnol – sulfated                                              | 4.31                  | 2.97               |
| Tauroolithocholic acid 3-sulfate, disodium salt                 | 4.08                  | 4.77               |
| $\alpha$ -Cholestanol                                           | 2.00                  | 1.70               |

The following equations relate to the individual classes of steroids and show the cross validated correlations (XV- $R^2$ ). It would appear the larger bile salt/ acid dataset has the lowest cross validated correlation. These datasets were tested with external compounds although the data indicates a negative correlation for the androstanes (-0.77) and no correlation for the pregnanes and bile salts/ acids. In all the equations ACCEPTOR = hydrogen bond acceptor, ALL = any atom, NP = non-polar and POSITIVE = positively charged. It would seem overall to show mainly steric/non-polar interactions while hydrogen bond acceptor descriptors are highlighted in the androstanes equation.

Androstanes activity =  $4.55 - 8.54 * \text{GC1 (ACCEPTOR)} - 12.07 * \text{GC2 (ALL)} - 6.06 * \text{GC3 (NP)} + 1.52 * \text{GC4 (NP)}$

N=20,  $R^2 = 0.94$ , Cross validated (XV)- $R^2 = 0.89$

Pregnanes activity =  $3.21 - 7.12 * \text{GC1 (NP)} - 21.56 * \text{GC2 (ALL)} + 3.59 * \text{GC3 (NP)} - 1.46 * \text{GC4 (ALL)} + 4.29 * \text{GC5 (NP)}$

N=23,  $R^2 = 0.91$ , XV- $R^2 = 0.84$

Bile salts / acids activity =  $0.43 - 23.81 * \text{GC1 (ALL)} + 34.3 * \text{GC2 (ALL)} - 6.07 * \text{GC3 (ALL)} + 5.88 * \text{GC4 (ALL)} - 5.04 * \text{GC5 (ALL)} + 3.89 * \text{GC6 (NP)} + 12.35 * \text{GC7 (ALL)} - 13.66 * \text{GC8 (POSITIVE)}$

N=41,  $R^2 = 0.77$ , XV- $R^2 = 0.64$
